# Supplementary material for: A novel long-term intravenous combined with local treatment with human amnion-derived mesenchymal stem cells for a multidisciplinary rescued uremic calciphylaxis patient and the underlying mechanism
Source: PubMed Central journal article supplement — J Mol Cell Biol. 2022 Feb 10;14(2):mjac010. doi: 10.1093/jmcb/mjac010 (PMC9205756; doi:10.1093/jmcb/mjac010), 2022-02-10
Supplement: mjac010_supplemental_file.pdf [file mjac010_supplemental_file.pdf]

## Supplementary material

### **A novel long-term intravenous combined with local treatment with human amnion-derived mesenchymal stem cells for a multidisciplinary rescued uremic calciphylaxis patient and the underlying mechanism**

Lianju Qin<sup>1,†,\*</sup>, Jing Zhang<sup>2,†</sup>, Yujie Xiao<sup>2,†</sup>, Kang Liu<sup>2</sup>, Yugui Cui<sup>1</sup>, Fangyan Xu<sup>2</sup>, Wenkai Ren<sup>2</sup>, Yanggang Yuan<sup>2</sup>, Chunyan Jiang<sup>1</sup>, Song Ning<sup>1</sup>, Xiaoxue Ye<sup>2</sup>, Ming Zeng<sup>2</sup>, Hanyang Qian<sup>2</sup>, Anning Bian<sup>2</sup>, Fan Li<sup>2</sup>, Guang Yang<sup>2</sup>, Shaowen Tang<sup>3</sup>, Zhihong Zhang<sup>4</sup>, Juncheng Dai<sup>3</sup>, Jing Guo<sup>5</sup>, Qiang Wang<sup>6</sup>, Bin Sun<sup>2</sup>, Yifei Ge<sup>2</sup>, Chun Ouyang<sup>2</sup>, Xueqiang Xu<sup>2</sup>, Jing Wang<sup>2</sup>, Yaoyu Huang<sup>2</sup>, Hongqing Cui<sup>2</sup>, Jing Zhou<sup>1</sup>, Meilian Wang<sup>7</sup>, Zhonglan Su<sup>8</sup>, Yan Lu<sup>8</sup>, Di Wu<sup>8</sup>, Jingping Shi<sup>9</sup>, Wei Liu<sup>10</sup>, Li Dong<sup>11</sup>, Yinbing Pan<sup>12</sup>, Baiqiao Zhao<sup>2,13</sup>, Ying Cui<sup>2,14</sup>, Xueyan Gao<sup>2,15</sup>, Zhanhui Gao<sup>2,16</sup>, Xiang Ma<sup>1</sup>, Aiqin Chen<sup>1</sup>, Jie Wang<sup>1</sup>, Meng Cao<sup>1</sup>, Qian Cui<sup>1</sup>, Li Chen<sup>1</sup>, Feng Chen<sup>17</sup>, Youjia Yu<sup>17</sup>, Qiang Ji<sup>17</sup>, Zhiwei Zhang<sup>17</sup>, Mufeng Gu<sup>18</sup>, Xiaojun Zhuang<sup>18</sup>, Xiaolin Lv<sup>2</sup>, Hui Wang<sup>2</sup>, Yanyan Pan<sup>2</sup>, Ling Wang<sup>2</sup>, Xianrong Xu<sup>2</sup>, Jing Zhao<sup>19</sup>, Xiuqin Wang<sup>20</sup>, Cuiping Liu<sup>21</sup>, Ningxia Liang<sup>22</sup>, Changying Xing<sup>2</sup>, Jiayin Liu<sup>1,\*</sup>, Ningning Wang<sup>2,\*</sup>

<sup>1</sup> State Key Laboratory of Reproductive Medicine, Center of Clinical Reproductive Medicine, The First Affiliated Hospital of Nanjing Medical University, Jiangsu Province Hospital, Nanjing, China

<sup>2</sup> Department of Nephrology, The First Affiliated Hospital of Nanjing Medical University, Jiangsu Province Hospital, Nanjing, China

<sup>3</sup> Department of Epidemiology and Biostatistics, School of Public Health, Nanjing Medical University, Nanjing, China

<sup>4</sup> Department of Pathology, The First Affiliated Hospital of Nanjing Medical University, Jiangsu Province Hospital, Nanjing, China

<sup>5</sup> Department of Cardiology, The First Affiliated Hospital of Nanjing Medical University, Jiangsu Province Hospital, Nanjing, China

<sup>6</sup> Department of Rheumatology, The First Affiliated Hospital of Nanjing Medical University, Jiangsu Province Hospital, Nanjing, China

<sup>7</sup> Department of Obstetrics, The First Affiliated Hospital of Nanjing Medical University, Jiangsu Province Hospital, Nanjing, China

<sup>8</sup> Department of Dermatology, The First Affiliated Hospital of Nanjing Medical University, Jiangsu Province Hospital, Nanjing, China

<sup>9</sup> Department of Burn and Plastic Surgery, The First Affiliated Hospital of Nanjing Medical University, Jiangsu Province Hospital, Nanjing, China

<sup>10</sup> Department of Nuclear Medicine, The First Affiliated Hospital of Nanjing Medical University, Jiangsu

Province Hospital, Nanjing, China

<sup>11</sup> Department of Infection, The First Affiliated Hospital of Nanjing Medical University, Jiangsu Province Hospital, Nanjing, China

<sup>12</sup> Department of Anesthesiology and Pain Management, The First Affiliated Hospital of Nanjing Medical University, Jiangsu Province Hospital, Nanjing, China

<sup>13</sup> Department of Nephrology, The First People's Hospital of Lianyungang, Lianyungang, China

<sup>14</sup> Department of Nephrology, Northern Jiangsu People's Hospital, Yangzhou, China

<sup>15</sup> Department of General Medicine, Geriatric Hospital of Nanjing Medical University, Nanjing, China

<sup>16</sup> Department of Nephrology, BenQ Medical Center, The Affiliated BenQ Hospital of Nanjing Medical University, Nanjing, China

<sup>17</sup> Department of Forensic Medicine, School of Basic Medical Sciences, Nanjing Medical University, Nanjing, China

<sup>18</sup> Department of Human Anatomy, School of Basic Medical Sciences, Nanjing Medical University, Nanjing, China

<sup>19</sup> Department of Outpatient Treatment Clinic, The First Affiliated Hospital of Nanjing Medical University, Jiangsu Province Hospital, Nanjing, China

<sup>20</sup> Department of International Cooperation, The First Affiliated Hospital of Nanjing Medical University, Jiangsu Province Hospital, Nanjing, China

<sup>21</sup> Department of Biological Specimen Repository, The First Affiliated Hospital of Nanjing Medical University, Jiangsu Province Hospital, Nanjing, China

<sup>22</sup> Academy of Clinical and Translational Research, The First Affiliated Hospital of Nanjing Medical University, Jiangsu Province Hospital, Nanjing, China

† These authors contributed equally to this work.

\* Correspondence to: Ningning Wang, Tel: +86-13813821064, E-mail: [wangnn@njmu.edu.cn](mailto:wangnn@njmu.edu.cn); Jiayin Liu, E-mail: [jyliu\\_nj@126.com](mailto:jyliu_nj@126.com); Lianju Qin, E-mail: [ljqin@njmu.edu.cn](mailto:ljqin@njmu.edu.cn)

**Running title:** HAMSCs for a multidisciplinary rescued uremic calciphylaxis patient

**Supplementary Table S1** Skin biopsy statistical analysis of inflammatory cells and blood vessels during hAMSC treatment by light microscopy.

|                                 | Inflammatory cells |             |             | Blood vessels |
|---------------------------------|--------------------|-------------|-------------|---------------|
|                                 | Neutrophils        | Lymphocytes | Plasmocytes |               |
| Magnification                   | 400                |             |             | 100           |
| Before hAMSC treatment          | 0.00               | 19.33       | 184.67      | 29.00         |
| 1 month after hAMSC treatment   | 65.00              | 75.00       | 59.00       | 125.00        |
| 20 months after hAMSC treatment | 2.67               | 9.33        | 5.33        | 17.00         |

**Supplementary Table S2** Target antibodies for the surface markers of hAMSCs.

| Antibody name                      | Antibody brand and item number |
|------------------------------------|--------------------------------|
| FITC mouse IgG2a (isotype control) | BD: 555573                     |
| PE mouse IgG1 (isotype control)    | BD: 555749                     |
| FITC-HLA-DR                        | BD: 562008                     |
| PE-CD44                            | BD: 555479                     |
| PE-CD73                            | BD: 550257                     |
| PE-CD90                            | BD: 555596                     |
| PE-CD105                           | BD: 560839                     |
| PE-CD11b                           | BD: 555388                     |
| PE-CD19                            | BD: 555413                     |
| PE-CD34                            | BD: 555822                     |
| PE-CD45                            | BD: 555483                     |

PE, polyethylene; FITC, fluorescein isothiocyanate; BD: Becton, Dickinson and Company (New Jersey, USA).

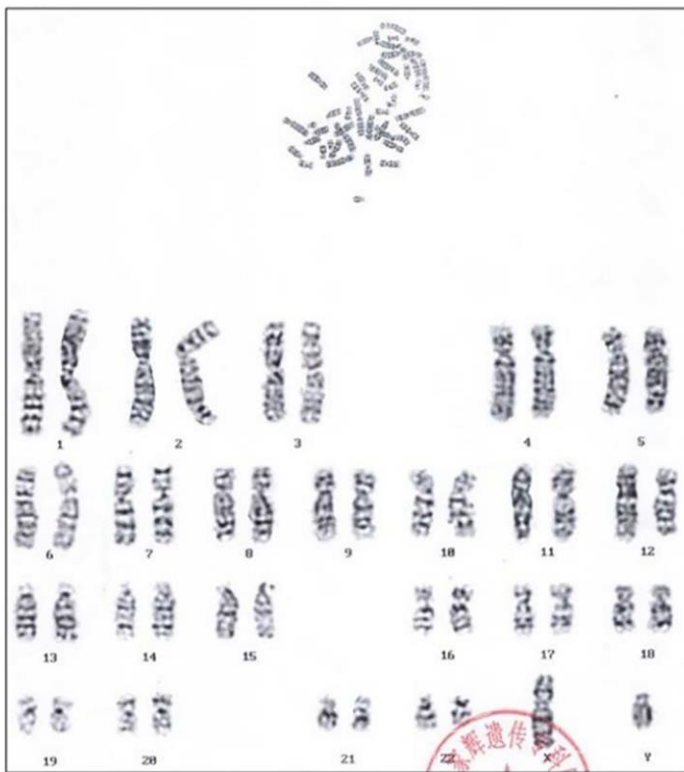

| Gene loci | A1   | A2   |
|-----------|------|------|
| D19S433   | 16.2 | 16.2 |
| D5S818    | 8    | 11   |
| D21S11    | 28   | 29   |
| D18S51    | 17   | 17   |
| D6S1043   | 18   | 18   |
| D3S1358   | 17   | 17   |
| D13S317   | 11   | 11   |
| D7S820    | 10   | 11   |
| D16S539   | 9    | 11   |
| CSF1PO    | 10   | 12   |
| Penta D   | 9    | 13   |
| AMEL      | X    | Y    |
| vWA       | 16   | 17   |
| D8S1179   | 12   | 14   |
| TPOX      | 9    | 11   |
| Penta E   | 14   | 15   |
| TH01      | 7    | 10   |
| D12S391   | 17   | 18   |
| D2S1338   | 19   | 23   |
| FGA       | 23   | 27   |

**Supplementary Figure S1** The karyotype and short tandem repeat (STR) of hAMSC10.
